# Supplementary material for: Uncovering the prominent role of satellite cells in paravertebral muscle development and aging by single-nucleus RNA sequencing
Source: PubMed Central journal article supplement — Genes Dis. 2023 Feb 3;10(6):2597–613. doi: 10.1016/j.gendis.2023.01.005 (PMC10404979; doi:10.1016/j.gendis.2023.01.005), 2023-02-03

# Supplementary figure 4

## a Single cell atlas of MSKCA\_058

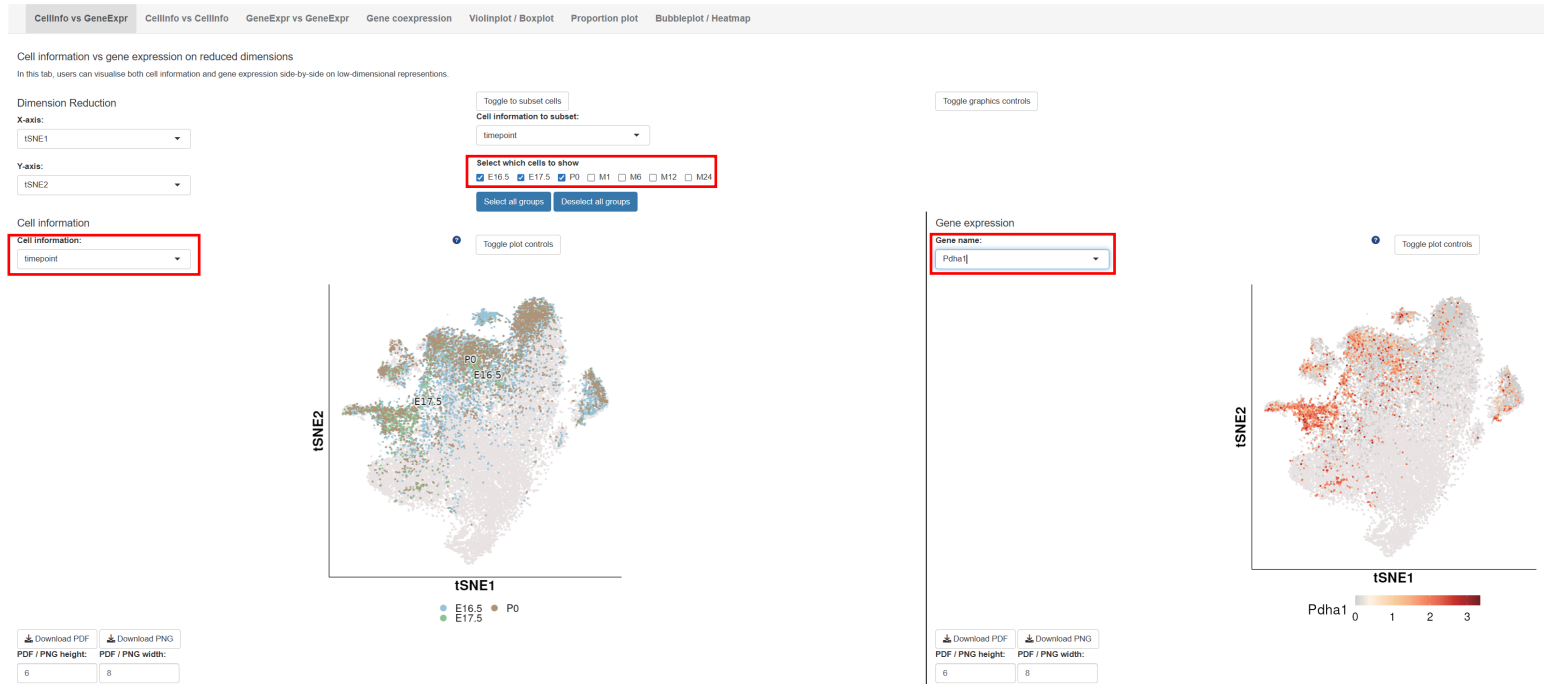

## b Single cell atlas of MSKCA\_058

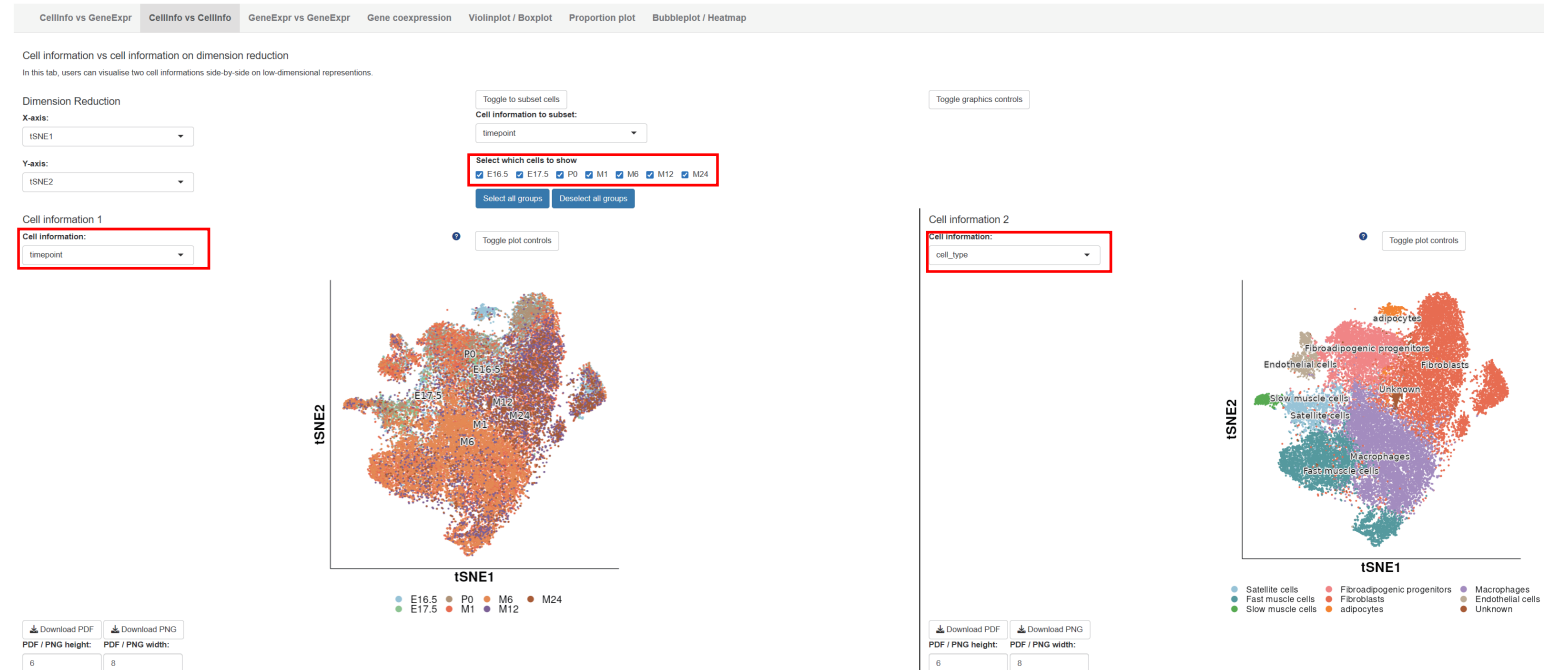

## c Single cell atlas of MSKCA\_058

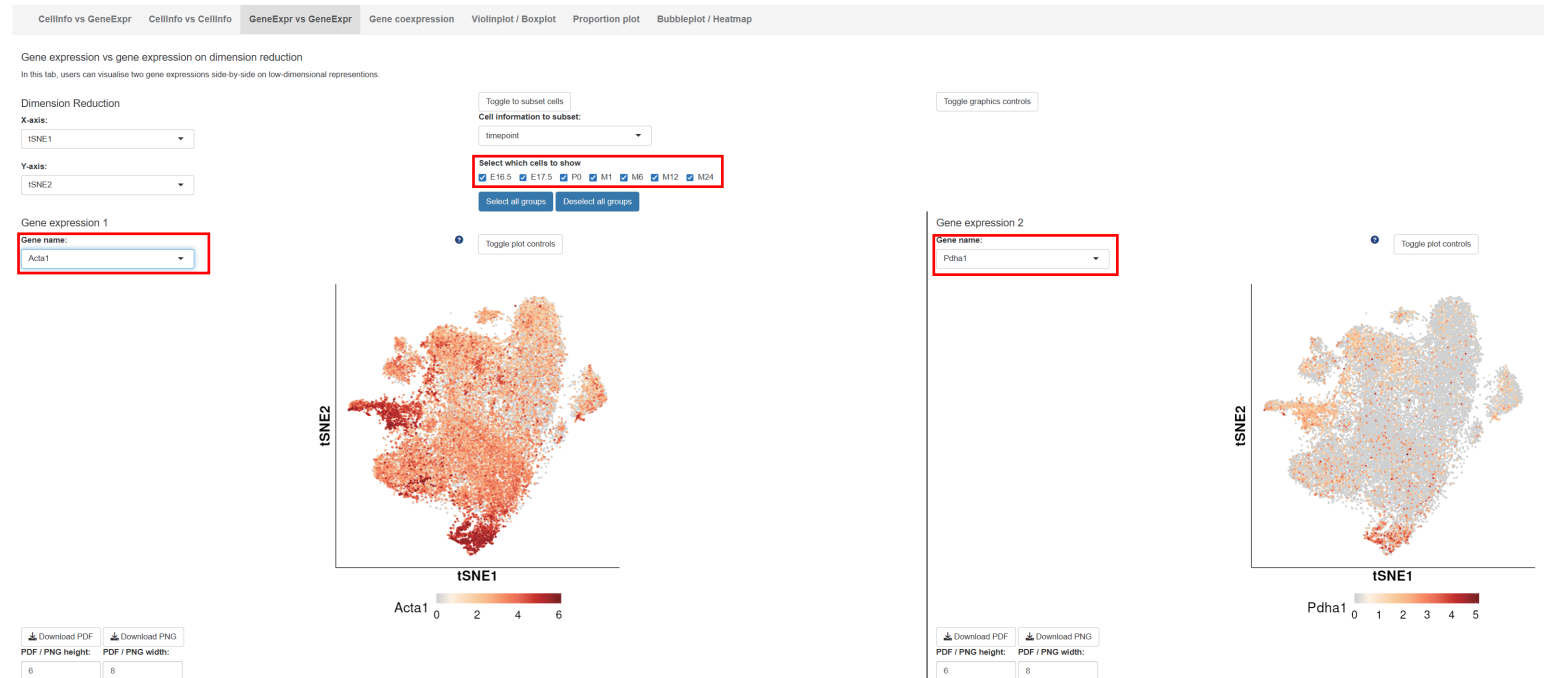

Supplement: mmc4.pdf [file mmc4.pdf]
