# Supplementary figures and images for: Uncovering the prominent role of satellite cells in paravertebral muscle development and aging by single-nucleus RNA sequencing
Source: PubMed Central journal article supplement — Genes Dis. 2023 Feb 3;10(6):2597–613. doi: 10.1016/j.gendis.2023.01.005 (PMC10404979; doi:10.1016/j.gendis.2023.01.005), 2023-02-03

Supplementary figure 1

E16.5

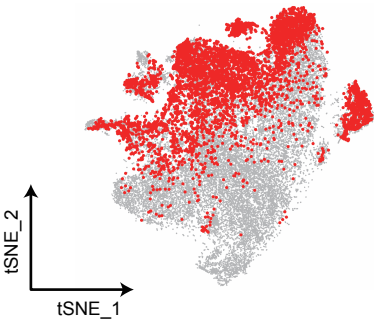

E17.5

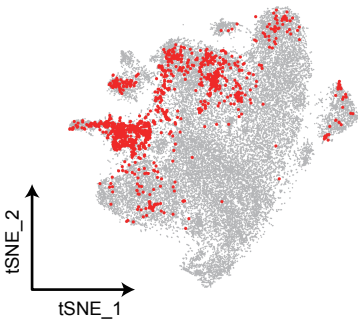

P0

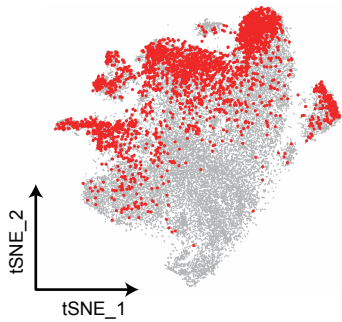

M1

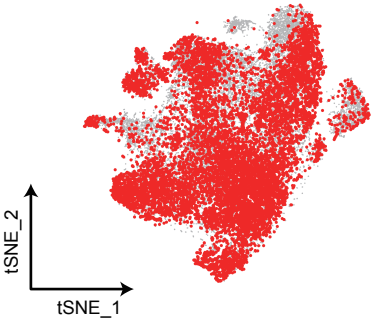

M6

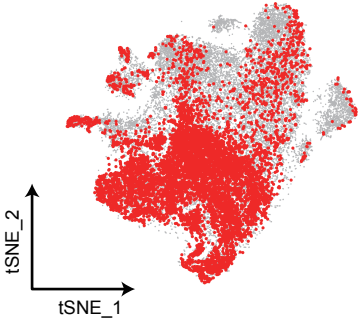

M12

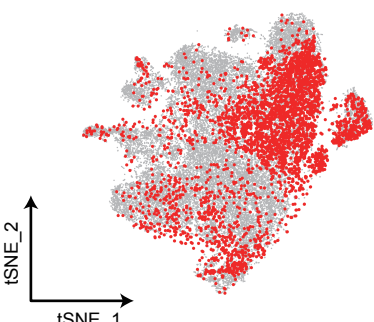

M24

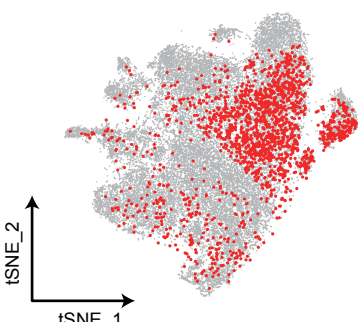

Supplement: mmc1.pdf [file mmc1.pdf]

# Supplementary figure 2

a

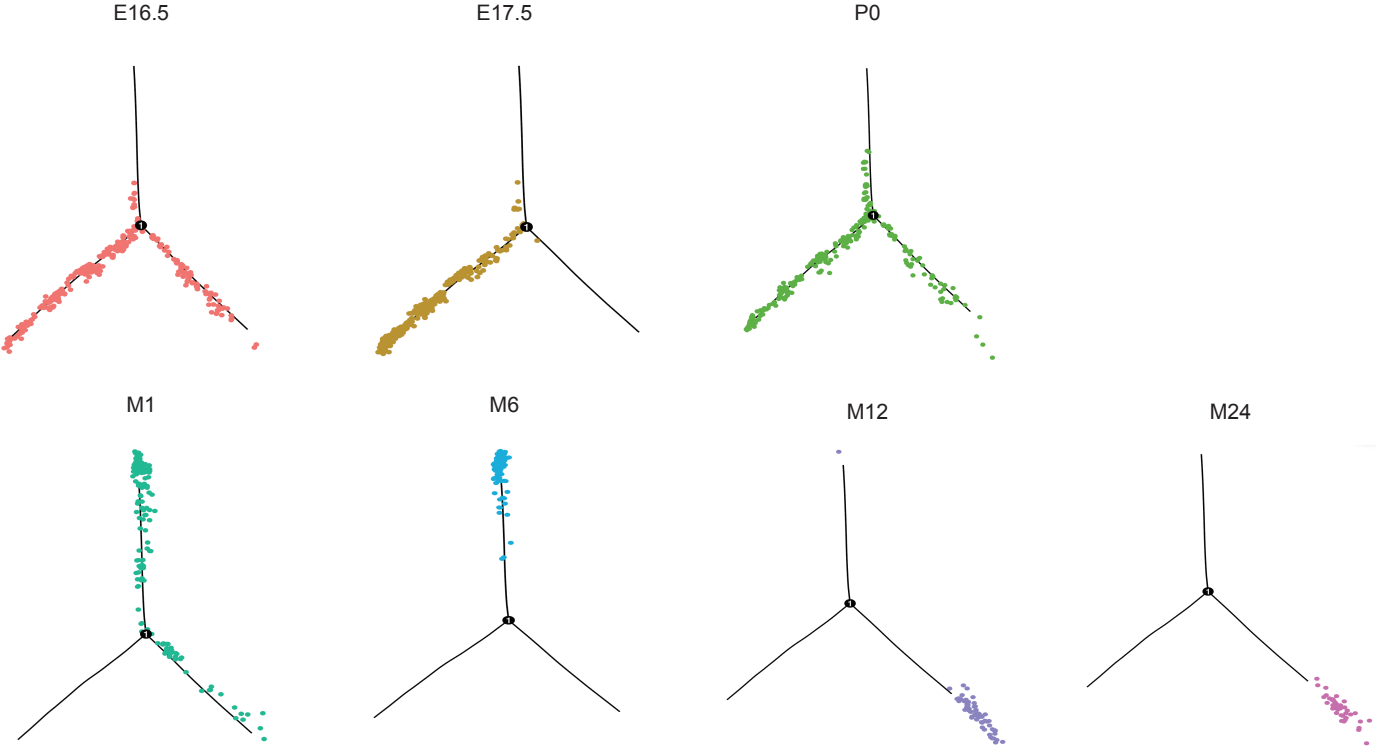

b

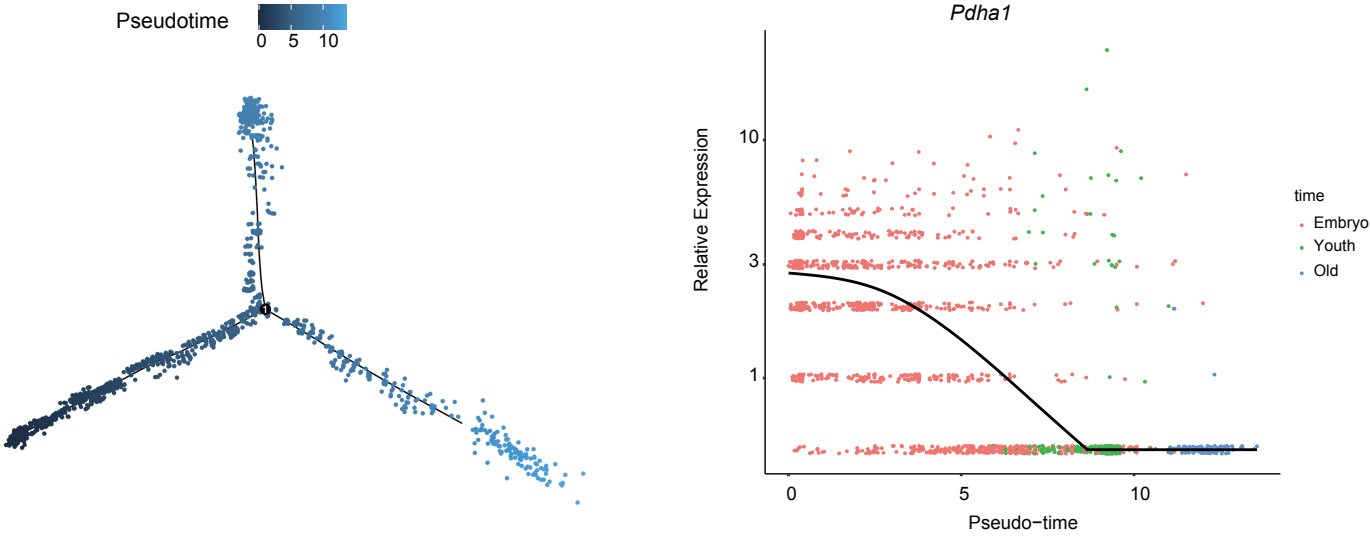

c

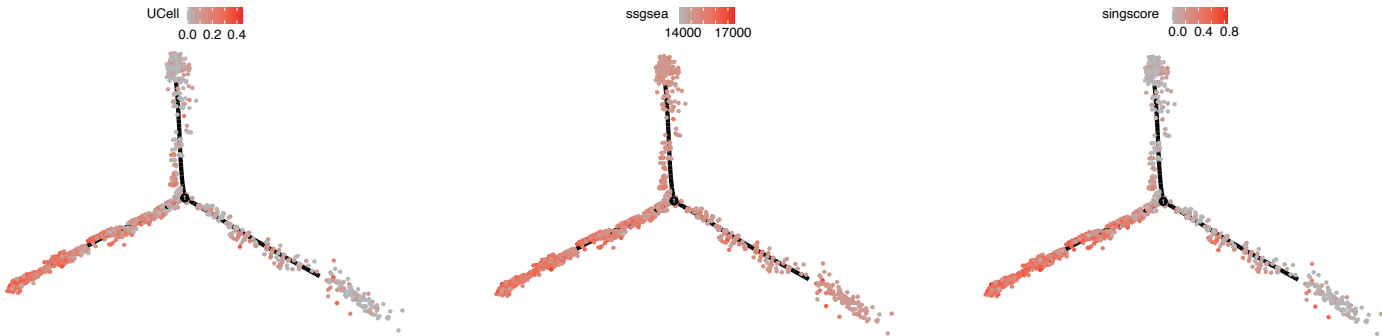

Supplement: mmc2.pdf [file mmc2.pdf]
